# Supplementary material for: Natural Deep Eutectic Solvents Based on Choline Chloride and Phenolic Compounds as Efficient Bioadhesives and Corrosion Protectors
Source: PubMed Central journal article supplement (PMC9241144; doi:10.1021/acssuschemeng.2c01976), 2022-06-13
Supplement: sc2c01976_si_001.pdf [file sc2c01976_si_001.pdf]

## Supporting Information (SI)

### Natural Deep Eutectic Solvents Based on Choline Chloride and Phenolic Compounds as Efficient Bioadhesives and Corrosion Protectors

Matías L. Picchio,<sup>a,b\*†</sup> Daniela Minudri,<sup>c†</sup> Daniele Mantione,<sup>d</sup> Miryam Criado-Gonzalez,<sup>c</sup> Gregorio Guzmán-González,<sup>c</sup> Ruth Schmarsow,<sup>c</sup> Alejandro J. Müller,<sup>c,e</sup> Liliana C. Tomé,<sup>f</sup> Roque J. Minari,<sup>1</sup> David Mecerreyes<sup>c,e\*</sup>

<sup>a</sup>Instituto de Desarrollo Tecnológico para la Industria Química (INTEC), CONICET, Güemes 3450, Santa Fe 3000, Argentina.

<sup>b</sup>Departamento de Química Orgánica, Facultad de Ciencias Químicas (Universidad Nacional de Córdoba), IPQA-CONICET, Haya de la Torre y Medina Allende, Córdoba 5000, Argentina.

<sup>c</sup>POLYMAT and Department of Polymers and Advanced Materials: Physics, Chemistry and Technology, Faculty of Chemistry, University of the Basque Country UPV/EHU, Paseo Manuel de Lardizábal, 3, 20018 Donostia-San Sebastián, Spain.

<sup>d</sup>POLYKEY Polymers, Joxe Mari Korta Center, Avda. Tolosa 72, 20018 Donostia-San Sebastian, Spain.

<sup>e</sup> IKERBASQUE, Basque Foundation for Science, Plaza Euskadi 5, 48009, Bilbao, Spain.

<sup>f</sup>LAQV-REQUIMTE, Department of Chemistry, NOVA School of Science and Technology, FCT NOVA, Universidade Nova de Lisboa, 2829-516 Caparica, Portugal.

Corresponding authors:

Matías L. Picchio (E-mail: [mlpicchio@santafe-conicet.gov.ar](mailto:mlpicchio@santafe-conicet.gov.ar))

David Mecerreyes (E-mail: [david.mecerreyes@ehu.es](mailto:david.mecerreyes@ehu.es))

<sup>†</sup>These authors contributed equally to this work

**Number of pages: 15**

**Number of figures: 5**

**Number of tables: 2**

## Experimental

### Materials

All chemicals were used without any further purification. Choline chloride (ChCl,  $\geq 98\%$ ), caffeic acid (CA,  $\geq 98.0\%$  HPLC), pyrogallol (PGA,  $\geq 98.0\%$  HPLC), tannic acid (TA, ACS reagent), gallic acid (GA,  $>97\%$  titration) vanillyl alcohol (VA,  $98\%$ ), hydrocaffeic acid (HCA,  $98\%$ ), quercetin hydrate (QUE,  $\geq 95\%$ ), vanillic acid (VAAc,  $97\%$ ), 3,4-Dihydroxy-L-phenylalanine (L-DOPA,  $\geq 98\%$  TLC), gelatin from bovine skin (gel strength  $\sim 225$  g Bloom, Type B), Iron(III) chloride hexahydrate (ACS reagent,  $97\%$ ), 2-hydroxy-2-methylpropiophenone ( $97\%$ ), were purchased from Sigma-Aldrich. Gentisic acid (GEN,  $>98\%$ ), phloretic acid (PHL,  $>98\%$ ), protocatechuic acid (PCA,  $>98\%$ ), and trans p-coumaric acid (CUA,  $>98\%$ ) were purchased from TCI. Ellagic acid ( $97\%$ ) was purchased from Acros Organics. Dipropylene glycol diacrylate was obtained from Arkema/Sartomer. The chemical structures and respective acronyms of the NADES studied in this work are shown in Figure 1.

### NADES preparation

NADES were prepared by the heating method, the most commonly used in the literature, based on mixing the two components (HBA and HBD) and heating them at  $95^\circ\text{C}$  under constant stirring until a homogeneous liquid is formed. The resulting mixtures were named ChCl-HBD.

ChCl-VA/gelatin adhesives were prepared by dissolving the protein ( $20\%$  w/v) in the VA-based NADES at  $90^\circ\text{C}$  under constant stirring. Then, the solution was left at  $4^\circ\text{C}$  for 24 h to get a highly adhesive and viscoelastic liquid.

The ChCl-TA- $\text{Fe}^{3+}$  complex was prepared by adding 180 mg of  $\text{FeCl}_3 \cdot 6\text{H}_2\text{O}$  salt to 1 g of ChCl-TA and vortexed until dissolution. The TA:  $\text{Fe}^{3+}$  molar ratio

used was 1:3. The complex formation was then proved by UV-vis spectroscopy using an IMPLEN NanoPhotometer® NP80. Samples were measured without any dilution.

## **Characterizations**

### *NMR spectroscopy*

<sup>1</sup>H and nuclear magnetic resonance (NMR) spectra were recorded in a Bruker Avance DPX 300 at 300.16 MHz, using deuterated dimethylsulfoxide (DMSO-d<sub>6</sub>) as solvent at room temperature.

### *FIR spectroscopy*

Fourier transform infrared (FTIR) spectra were recorded on a Bruker Alpha II spectrophotometer employing a Platinum ATR module with a diamond window.

### *Thermal analysis*

The thermal properties of the NADES were analyzed by thermogravimetric analysis (TGA) and differential scanning calorimetry (DSC). For TGA analysis, a TA Instruments Q500 equipment was used. Samples of about 30 mg were heated from 25 to 600 °C at a heating rate of 10 °C·min<sup>-1</sup> and under a nitrogen atmosphere. The temperature at maximal decomposition rate ( $T_{max}$ ) was determined as the temperature at the main peak of the derivative weight loss curve.

The DSC experiments were performed on a PerkinElmer 8500 DSC equipped with an Intracooler III. Samples of roughly 3 mg were crimped in non-recyclable aluminum hermetic pans and analyzed under a nitrogen atmosphere by heating and cooling cycles at a rate of 20 °C/min. First, the samples were heated from 25 to 100 °C and kept isothermally for 3 min to erase the thermal history.

Subsequently, the samples were cooled to  $-70\text{ }^{\circ}\text{C}$  and kept isothermally for 10 min. Second-run heating cycles were conducted and further used to investigate the phase transition behavior of all samples.

#### *Ionic conductivity measurements*

Ionic conductivity ( $\sigma$ ) was calculated from electrochemical impedance spectroscopy (EIS) measurements. A symmetrical stainless steel/NADES/stainless steel cell was assembled. The distance between the electrodes ( $l$ ) was kept fixed at  $\sim 0.83\text{ mm}$ , using a silicone spacer ring with an inner area ( $A$ ) of  $0.502\text{ cm}^2$ . EIS measurements were carried out from  $80\text{ }^{\circ}\text{C}$  to  $20\text{ }^{\circ}\text{C}$  at every  $10\text{ }^{\circ}\text{C}$  intervals performed applying a  $10\text{ mV}$  amplitude perturbation in the  $1\text{ MHz}$  to  $10\text{ mHz}$  frequency range at open circuit potential (OCP) conditions in a potentiostat galvanostat 302N from Autolab coupled to a Microcell HC temperature controller.

The fits of the experimental results were carried out using a nonlinear regression algorithm implemented in the Zview® software. The ohmic resistance ( $R_b$ ) of the sample, estimated from the Nyquist plot at the low-frequency end of the semi-circle, was used to calculate  $\sigma$  using the following equation:

$$\sigma = \frac{1}{R_b} \frac{l}{A} \quad (\text{Eq. 1})$$

#### *Rheological measurements.*

Rheological tests were carried out with an AR-G2 rheometer (TA instruments) using a cone-plate geometry of  $20\text{ mm}$  radius,  $1^{\circ}59'36''$  angle, and  $58\text{ }\mu\text{m}$  gap. First, the viscosity vs. shear rate, from  $0.1$  to  $1000\text{ s}^{-1}$ , was measured at  $25^{\circ}\text{C}$ . Then, the temperature-dependent viscosities were measured from  $4$  to  $100^{\circ}\text{C}$  at

fixed shear rates of  $1 \text{ s}^{-1}$ , for high viscosity NADES, and  $100 \text{ s}^{-1}$  for low viscosity NADES.

For ChCl-VA/gelatin adhesives, a plate-plate geometry of 20 mm diameter and 500  $\mu\text{m}$  gap was used. Oscillatory strain sweeps were carried out from 0.01 to 1000% strain at 1 Hz frequency and  $25^\circ\text{C}$ , and frequency sweeps from 0.01 to 40 Hz at 1% strain and  $25^\circ\text{C}$ . Temperature sweeps were performed from 4 to  $45^\circ\text{C}$  at 1% strain and 1 Hz frequency, and flow sweeps from 0.1 to  $1000 \text{ s}^{-1}$  at  $25^\circ\text{C}$ .

#### *Probe-tack test*

Adhesion measurements were performed using a TA HD plus Texture Analyzer equipment (Texture Technologies). Samples were prepared on glass support by applying an adhesive layer of about 1.5 mm thickness. In the probe-tack tests, a circular Delrin<sup>®</sup> probe (10 mm  $\varnothing$ ) comes into contact with the sample at a given velocity of 1 mm/s. A 500 g compressive force is applied for 1 s, and the probe is removed from the film at a controlled velocity. The material tackiness was defined as the maximum stress, while the tack adhesion energy ( $W_{\text{adh}}$ ) was calculated from the area under the stress-strain curve and the sample thickness.

#### *Corrosion test*

##### *Preparation of mild steel and UV-polymerizable coating*

Before the experiments, the mild steel AS1020 surface was cleaned and degreased with acetone at room temperature.

An acrylic UV-curable coating was composed of dipropylene glycol diacrylate and 2-hydroxy-2-methylpropiophenone (3 wt%) and applied onto the steel (or the steel and ChCl-TA) surface using a doctor blade technique, thus obtaining a

thickness coating of 200  $\mu\text{m}$  in both cases (see Scheme S1). The precursor mixture was irradiated for 120 s using a UVC-5 (DYMAX) UV Curing Conveyor System with a lamp intensity of 400  $\text{mW}\cdot\text{cm}^{-2}$ .

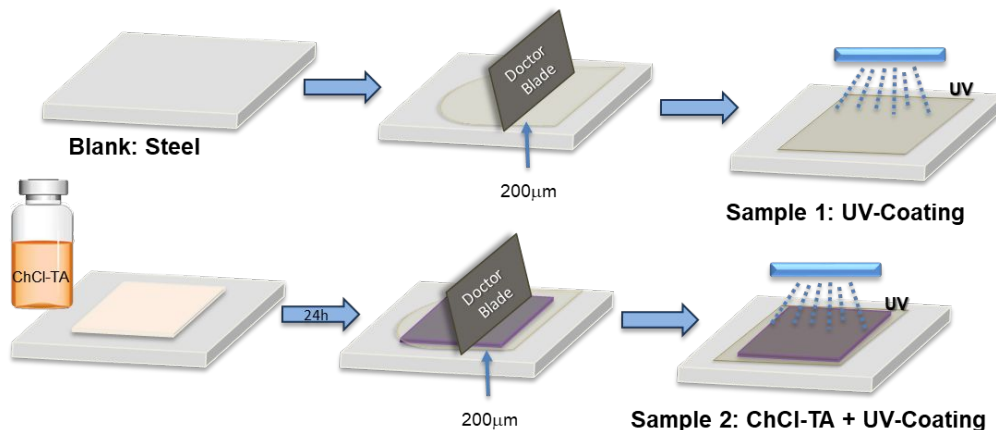

**Scheme S1.** Scheme of the coating layer preparation over steel using the doctor blade technique.

The acrylic coatings were formed by UV-curing of the monomer formulation (dipropylene glycol diacrylate + 2-hydroxy-2-methylpropiophenone) applied on the steel surface. For the ChCl-TA + polymer-coated samples, the steel was painted with ChCl-TA and left at room temperature for 24 hours to allow metal-iron coordination. When the surface was utterly dark red, an acrylic coating was formed in the same condition to compare the protective effect

#### *Electrochemical measurements*

A BioLogic VMP3 multi-channel potentiostat (Biologic, Seyssinet-Pariset, France) combined with EC Lab V10.44 software was used for the electrochemical experiments. A three-electrode cell was used with Mild Steel AS1020 as the working electrode, graphite rod as the counter electrode, and Ag/AgCl (3M KCl) as the reference electrode. Samples were immersed in 0.01M NaCl aqueous solution for 24 hours, and the immersed area was 0.95  $\text{cm}^2$ .

### *Potentiodynamic polarization measurements*

Potentiodynamic polarization curves were obtained by changing the potential from -150 to +250 V vs. open circuit potential (OCP) with a scan rate of 2 mV·s<sup>-1</sup>. We use the Tafel extrapolation to obtain the corrosion parameters, and the inhibitive efficiency ( $\eta\%$ ) was calculated through the following expression.

$$\eta\% = \frac{I_{corr}^0 - I_{corr}}{I_{corr}^0} \times 100$$

Where  $I_{corr}^0$  and  $I_{corr}$  are the corrosion current densities without and with inhibitor coatings, respectively.

### *Electrochemical Impedance Spectroscopy (EIS)*

Electrochemical impedance spectroscopy measurements were carried out using the aforementioned BioLogic VMP3 potentiostat. The the impedance at the OCP was monitored in the frequency range from 1 MHz to 10 mHz, with 6 points per decade and a sinusoidal amplitude of 10 mV. Impedances responses were monitored after each hour during 24 h of exposition to 0,01M NaCl solution.

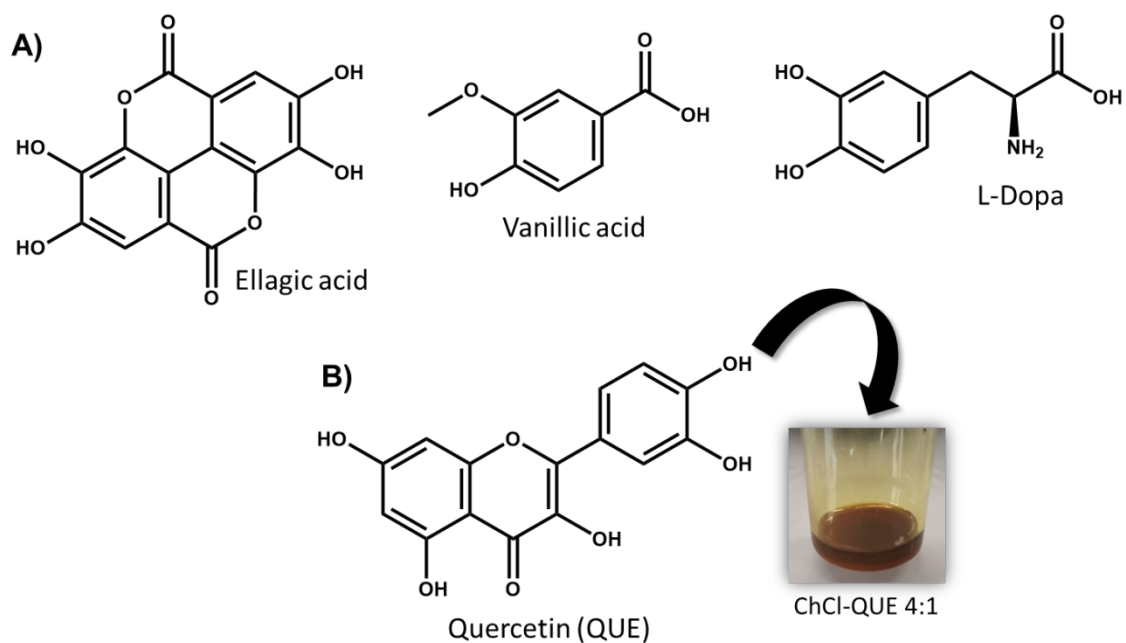

**Figure S1.** Chemical structures of (A) different polyphenols that showed no interaction with ChCl and (B) the flavonol QUE yielding a NADES at 4:1 molar ratio.



ChCl-PHL 1:1

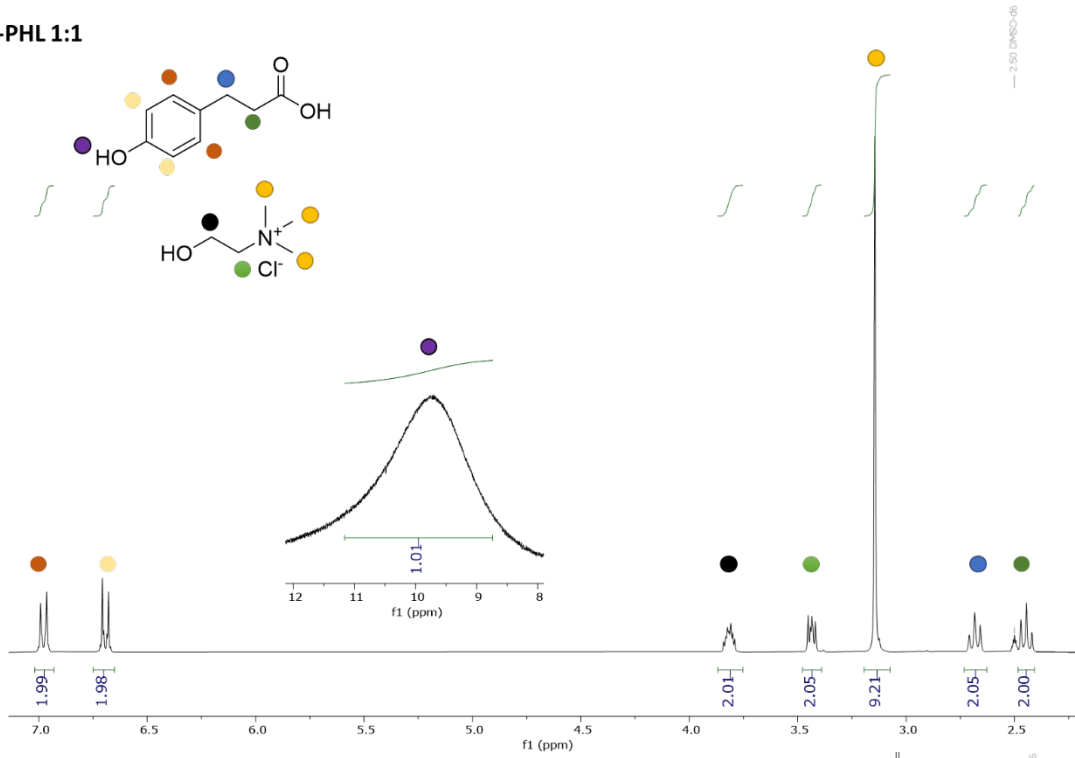

ChCl-GEN 2:1

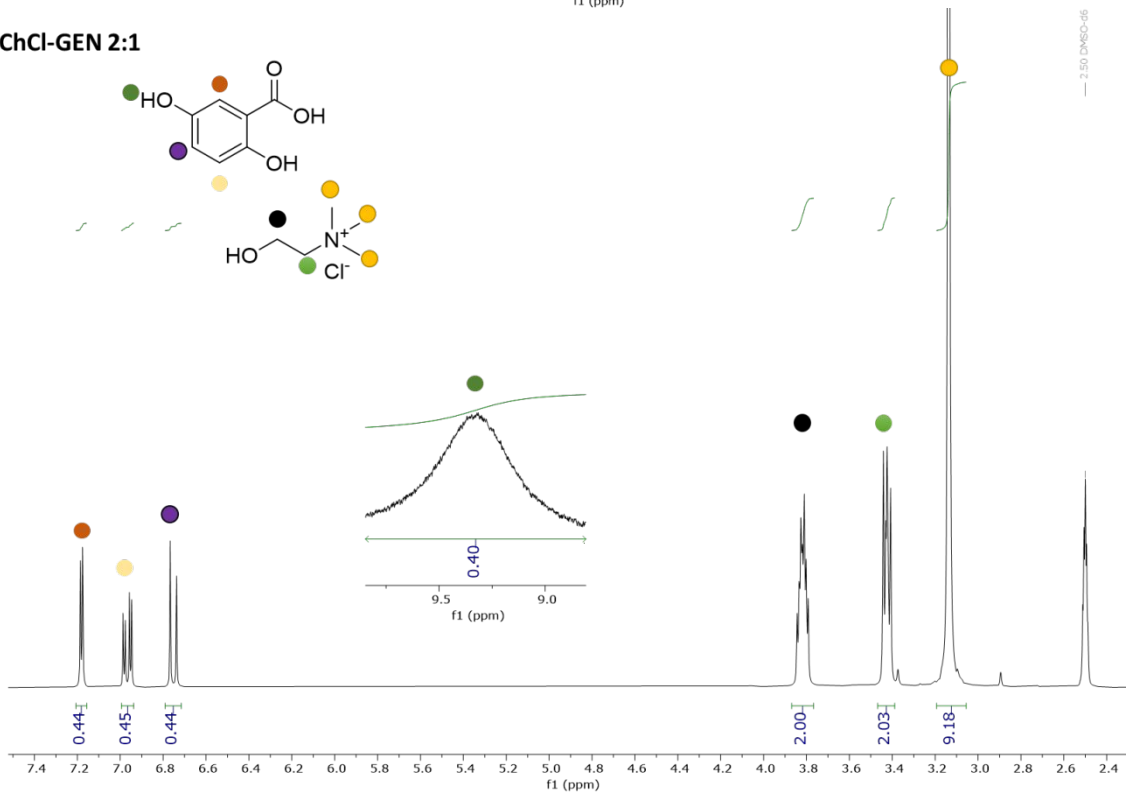

ChCl-GA 3:1

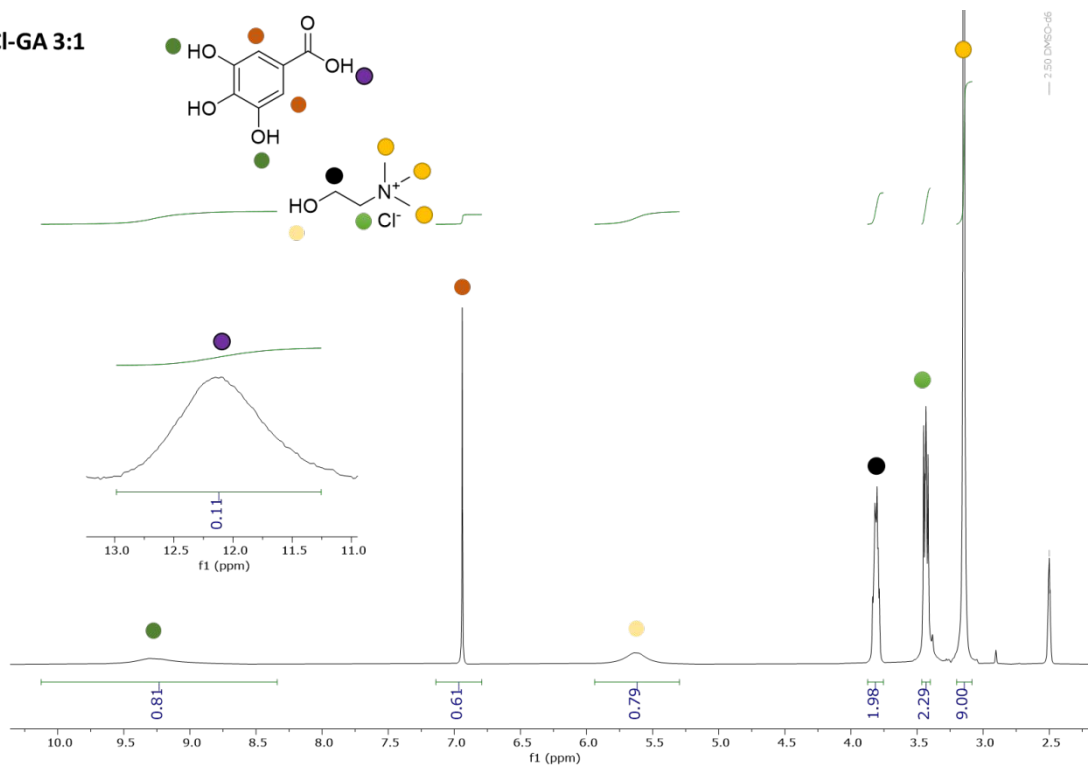

ChCl-CUA 2:1

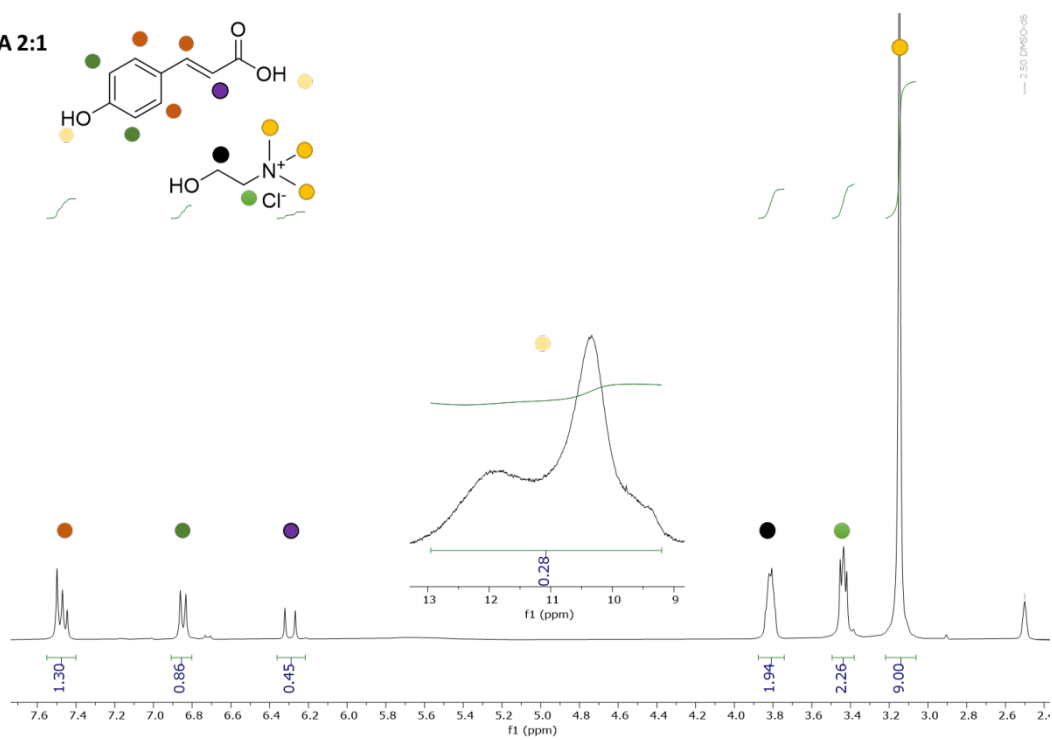

ChCl-PGA 1:1

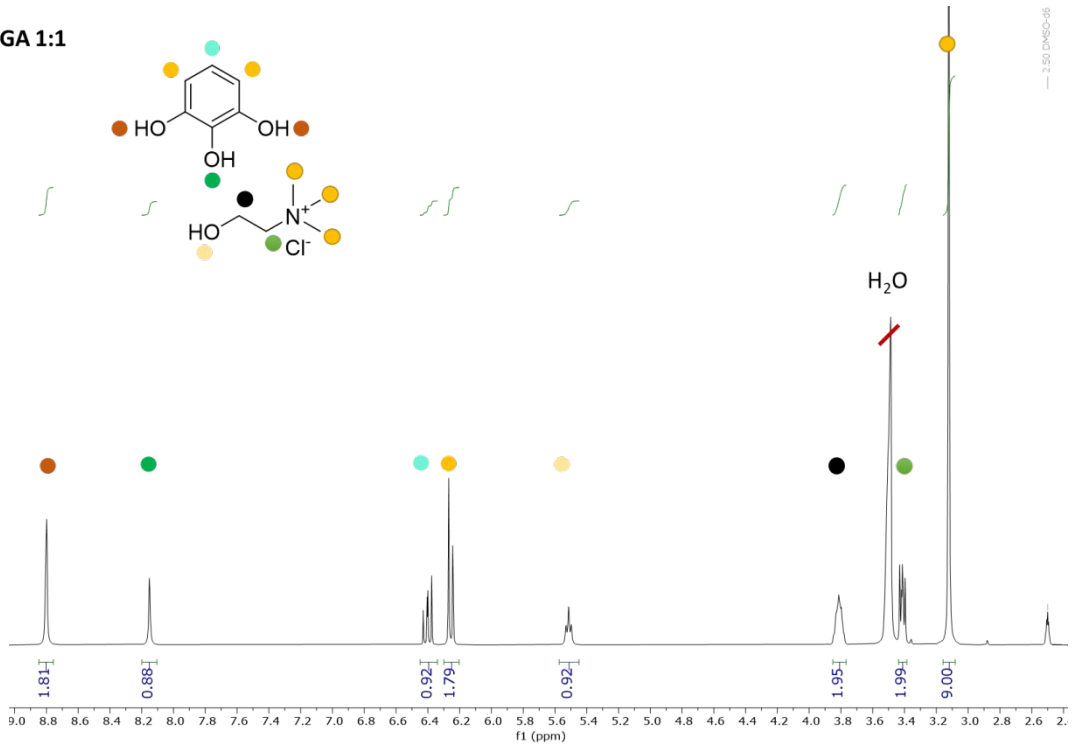

ChCl-PCA 2:1

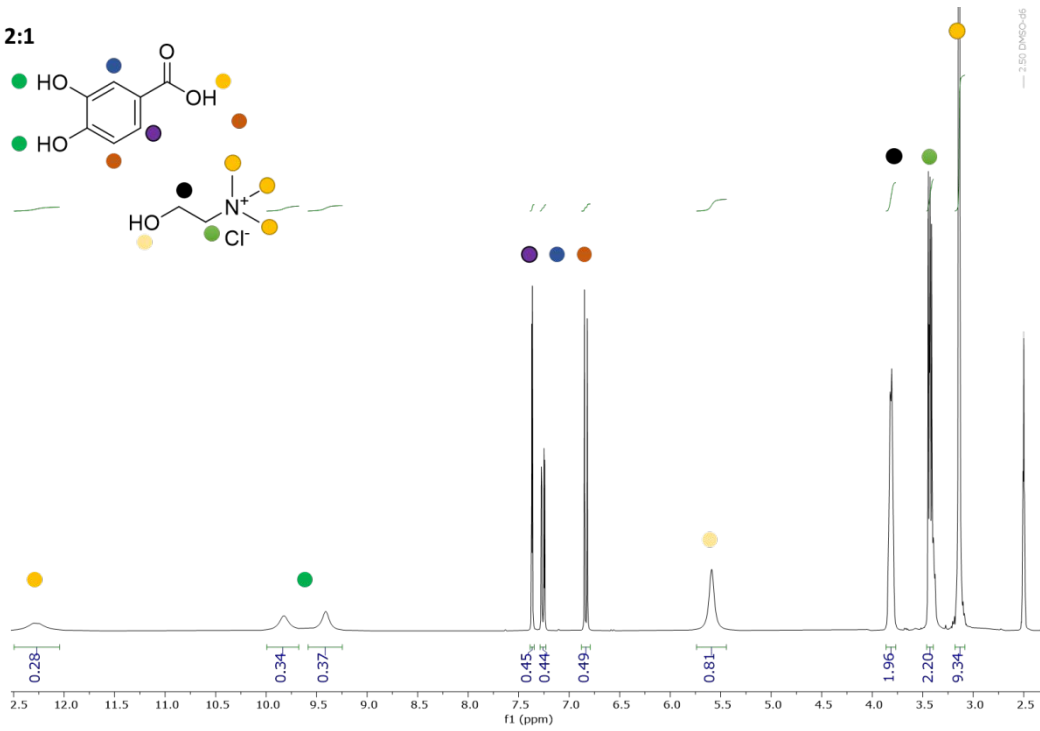

ChCl-CA 2:1

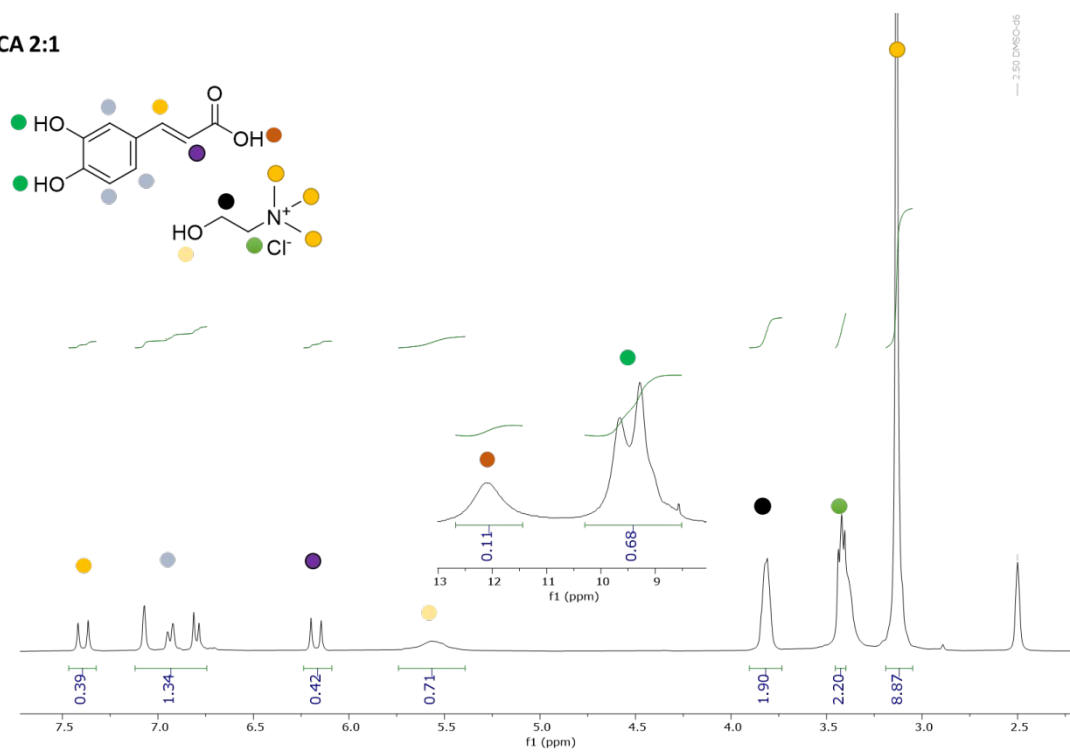

ChCl-TA 20:1

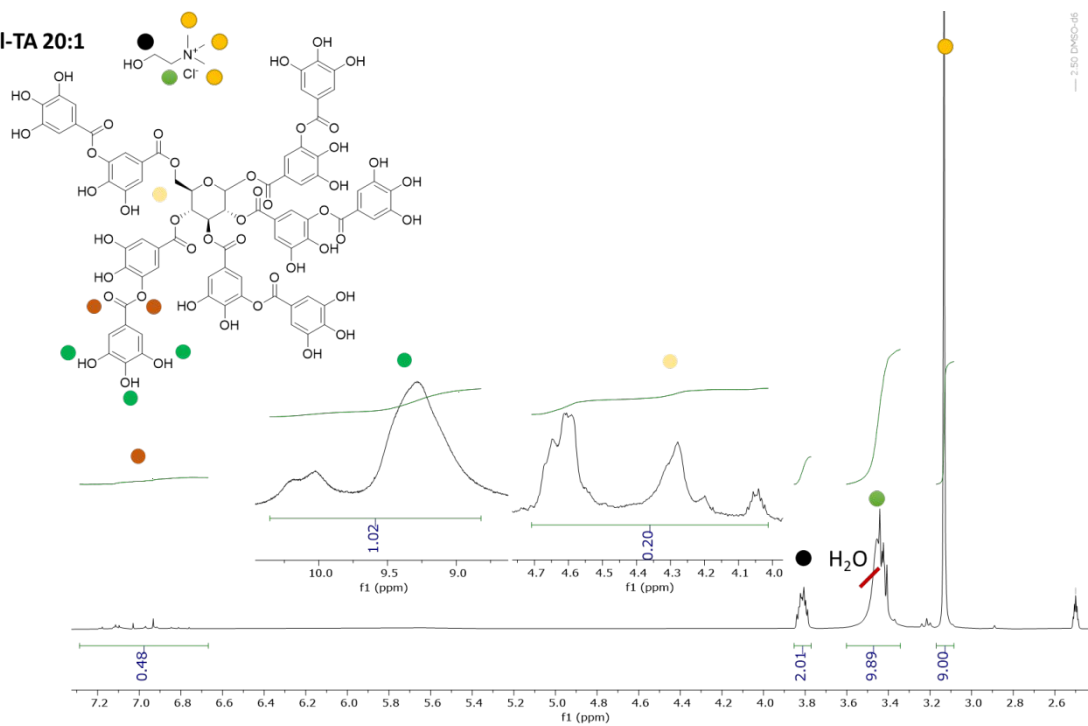

**Figure S2.** <sup>1</sup>H NMR spectra of the NADES formed by ChCl and different natural phenolic compounds.

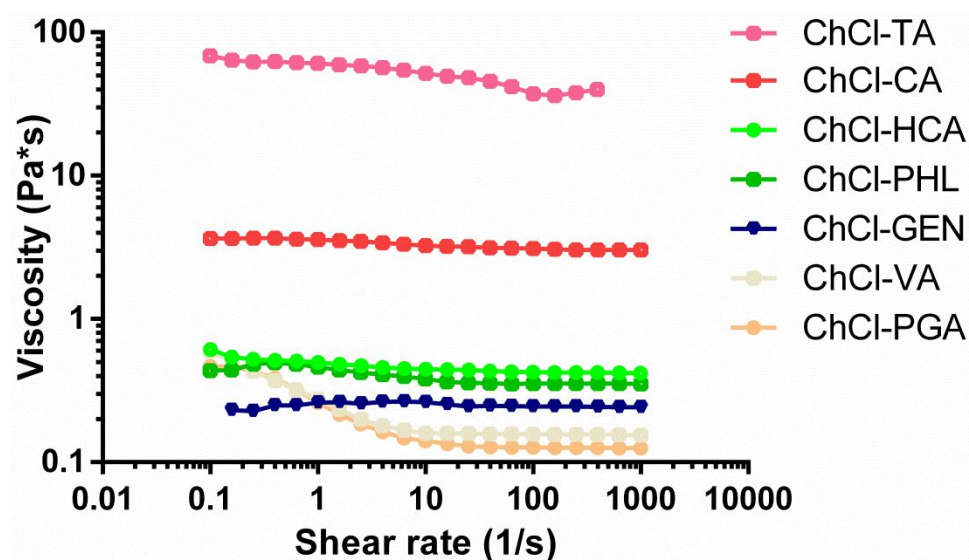

**Figure S3.** Viscosity vs. shear rate curves for the polyphenols-based NADES.

**Table S1.**  $E_a$  values for the viscosity of NADES as a function of temperature, determined by Eq 1.

| NADES    | $E_a$ (kJ/mol) | $R^2$  |
|----------|----------------|--------|
| ChCl-TA  | 9493.3         | 0.9951 |
| ChCl-PGA | 6997.1         | 0.9844 |
| ChCl-VA  | 6474.3         | 0.9728 |
| ChCl-PHL | 6296.7         | 0.986  |
| ChCl-HCA | 6201.3         | 0.9971 |
| ChCl-CA  | 5121.3         | 0.9856 |
| ChCl-GEN | 4043.9         | 0.989  |

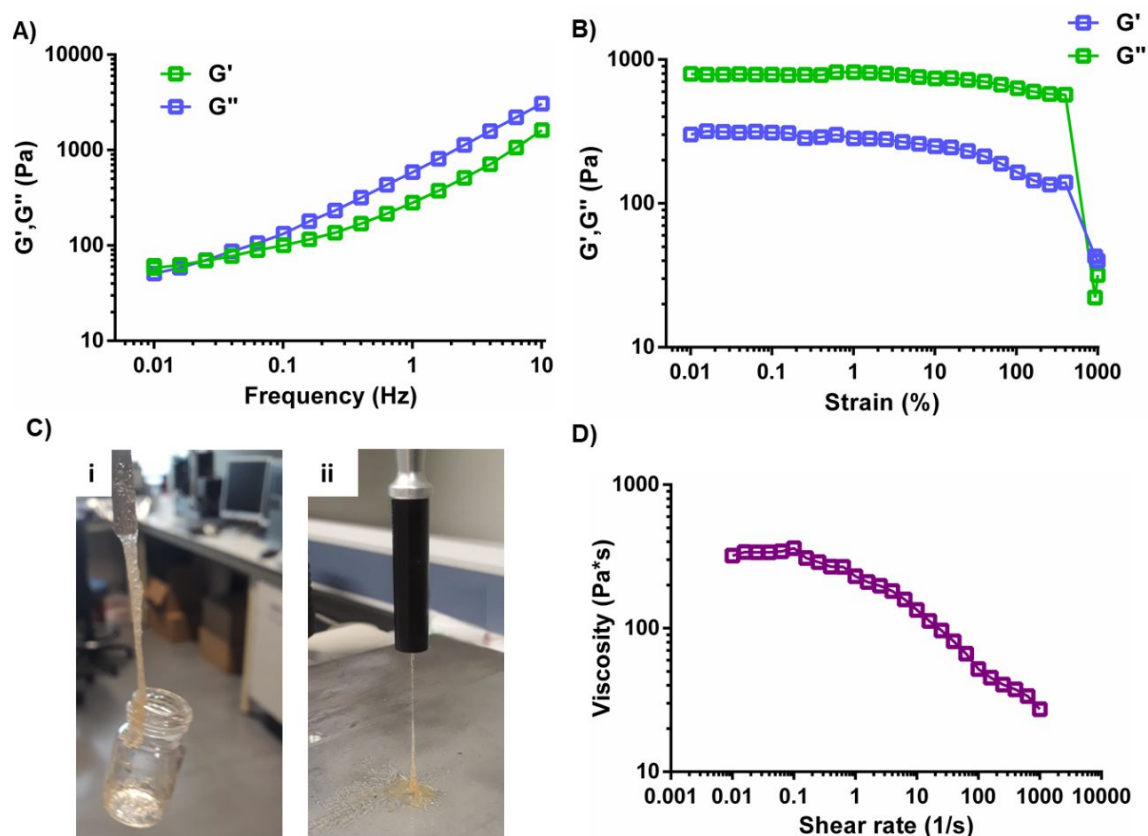

**Figure S4.** (A) Frequency and (B) amplitude sweeps for ChCl-VA/gelatin bioadhesive at 25 °C and 1 Hz. (C) Pictures of: one glass vial hanging from the bioadhesive material (i); and adhesive debonding during probe tack test (ii). (D) Flow curve for the adhesive material at 25 °C.

**Table S2.** Corrosion parameters and inhibition efficiency obtained from polarization curves after 24 h immersion in 0,01M NaCl aqueous solution.

|                     | $-E_{corr}$<br>(V vs<br>Ag/AgCl) | $I_{corr}$<br>( $\mu A\ cm^{-2}$ ) | $\beta a$<br>(mV/dec) | $Bc$<br>(mV/dec) | $\% \eta$ |
|---------------------|----------------------------------|------------------------------------|-----------------------|------------------|-----------|
| Steel               | 0.707                            | 21.3                               | 16.7                  | 24.8             | -         |
| UV-Coating          | 0.704                            | 5.4                                | 19.1                  | 23.1             | 74.6%     |
| ChCl-TA+ UV-Coating | 0.602                            | 1.4                                | 21.5                  | 21.5             | 93.4%     |

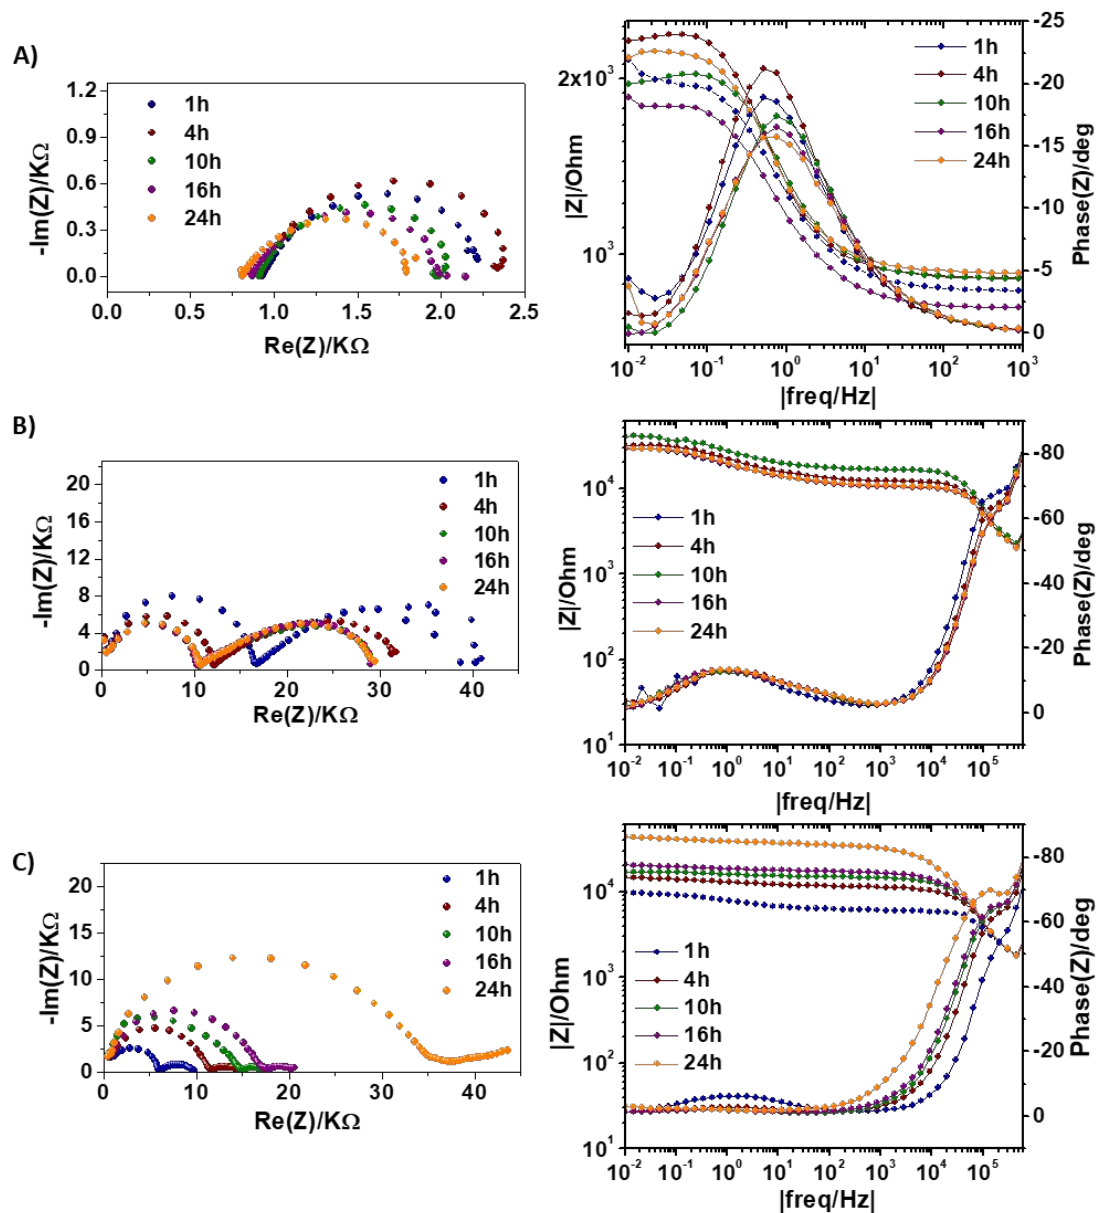

**Figure S5:** Nyquist plots and Bode plots of (A) cleaned mild steel, (B) acrylic-coated mild steel and (C) ChCl-TA + acrylic-coated mild steel along the immersion time.
